# Supplementary material
Source: publisher site journal article supplement (https://www.dovepress.com/article/250198)
Supplement: Supplementary file 1 [file get_supplementary_file.php]

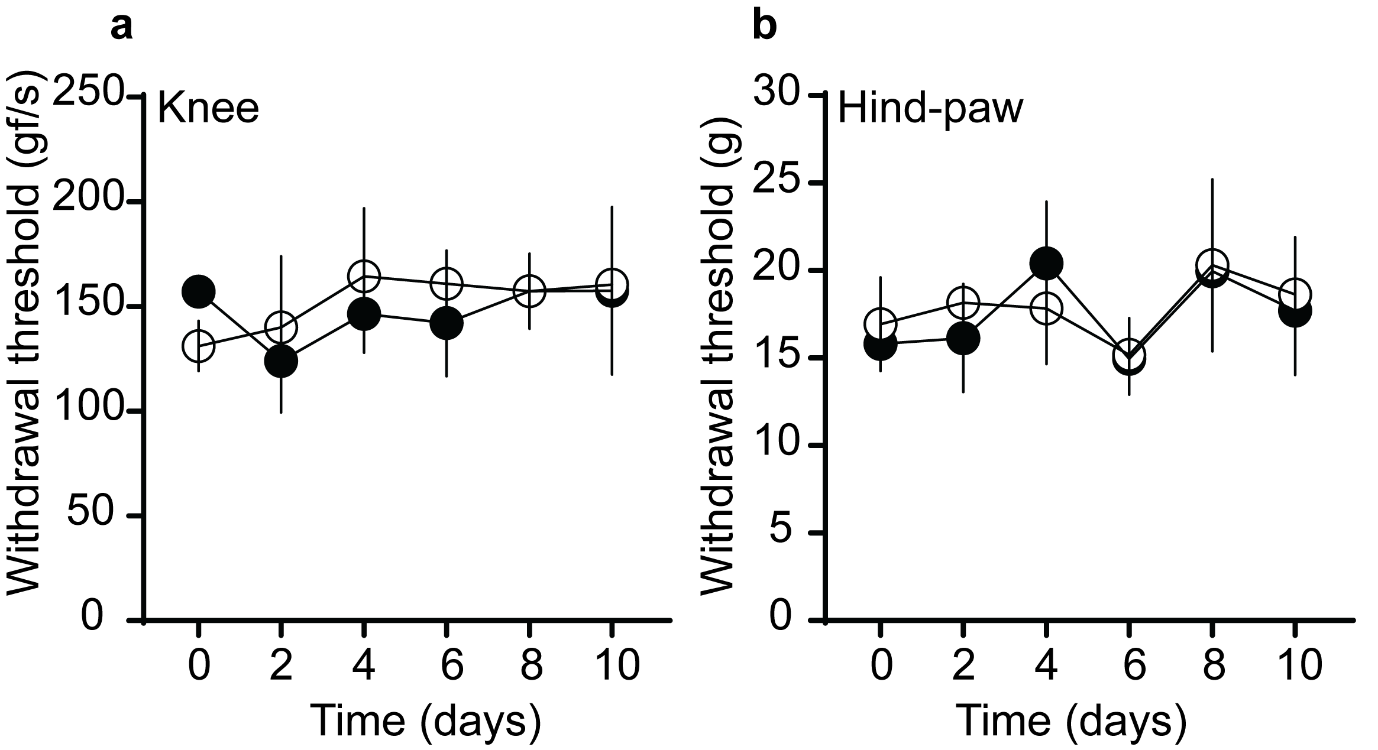


Suppl. Fig 1. Tumor afflicted limbs of rats injected with heat-killed MRMT-1 breast cancer cells demonstrated local pressure evoked withdrawal response (a), and mechanical-stimulus evoked withdrawal response (electronic von Frey) (b) that were similar in ipsilateral and contralateral limbs. Data shown are mean ± S.D., obtained from 4 rats (closed symbols indicate ipsilateral and open symbols indicate contralateral limbs).


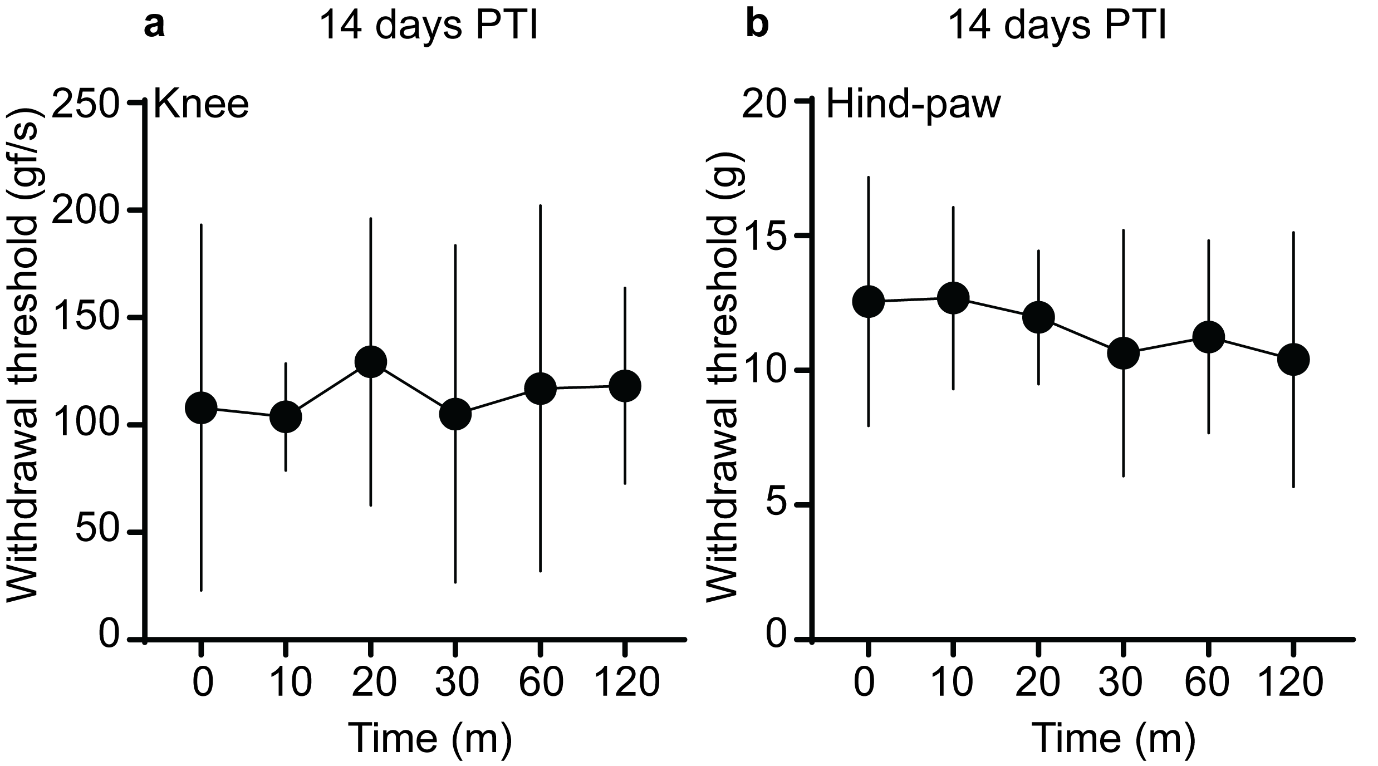


Suppl. Fig 2. Peritumoral injection of vehicle control (saline) did not alter tumor-induced primary-pressure-evoked hyperalgesia (a) or tumor-induced distal hyperalgesia (b) in CIBP. Data shown are mean ± S.D., from 4 rats (closed symbols indicate ipsilateral limb).
